# Supplementary material for: Constructing P-doped self-assembled V2C MXene/NiCo-layered double hydroxide hybrids toward advanced lithium storage
Source: Royal Society of Chemistry journal article supplement (doi:10.1039/d3ma00027c), 2023-01-01
Supplement: d3ma00027c1.pdf [file d3ma00027c1.pdf]

## Supporting Information

### Constructing P-doped self-assembled V<sub>2</sub>C MXene/NiCo-layered double hydroxide hybrids toward advanced lithium storage

Xi Guo<sup>a</sup>, Li Li<sup>a\*</sup>, Shuo Wang<sup>a</sup>, Jian Shen<sup>a</sup>, Yanan Xu<sup>b\*</sup>, Bingqiang Cao<sup>a</sup>

<sup>a</sup>School of Materials Science and Engineering, University of Jinan, Jinan 250022,  
Shandong, China

<sup>b</sup>Faculty of Education, Tianjin Normal University, Tianjin 300387, China.

\*Corresponding-Author: Li Li

E-mail: mse\_lil@ujn.edu.cn (L. Li)

## Supplementary Figures

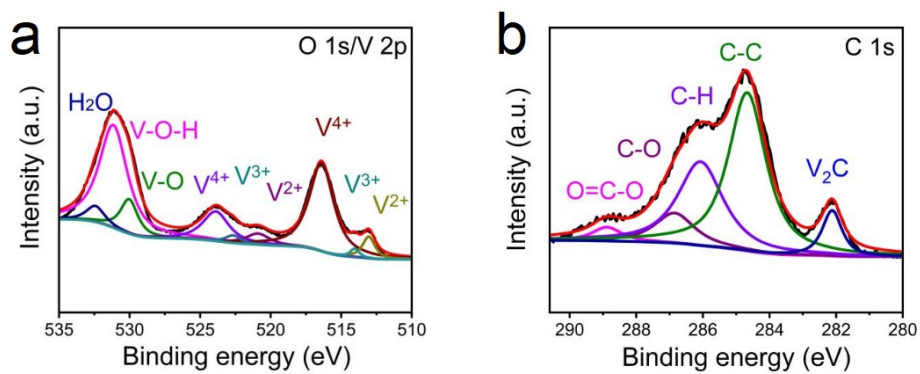

**Figure S1** High-resolution XPS spectra of (a) O 1s/V 2p and (b) C 1s in the V<sub>2</sub>C.

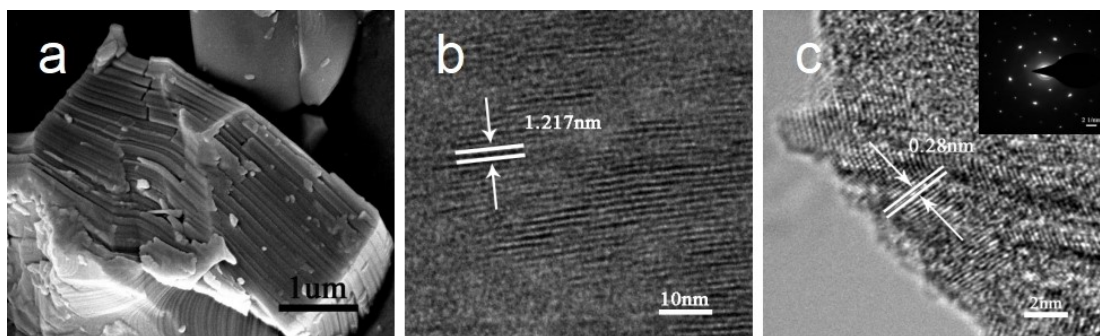

**Figure S2** (a) SEM image of VAl<sub>2</sub>C MAX; (b) TEM and (c) HRTEM images of V<sub>2</sub>C MXene, the inset corresponds to the SAED pattern of V<sub>2</sub>C.

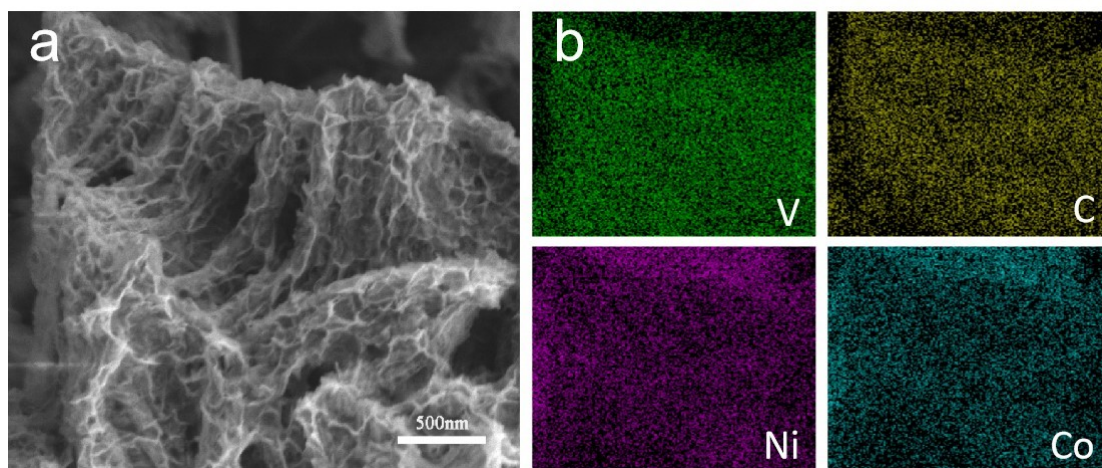

**Figure S3** (a) SEM image of V<sub>2</sub>C/NiCo-LDH hybrids; (b) EDS results of V<sub>2</sub>C/NiCo-LDH hybrids.

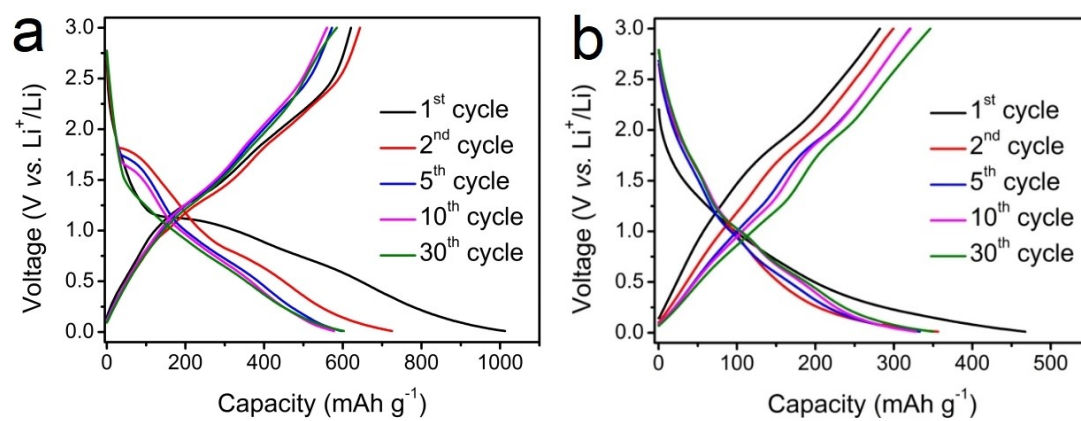

**Figure S4** Selected galvanostatic charge-discharge profiles of the (a)  $\text{V}_2\text{C}/\text{NiCo-LDH}$  and (b)  $\text{V}_2\text{C}$  electrodes.

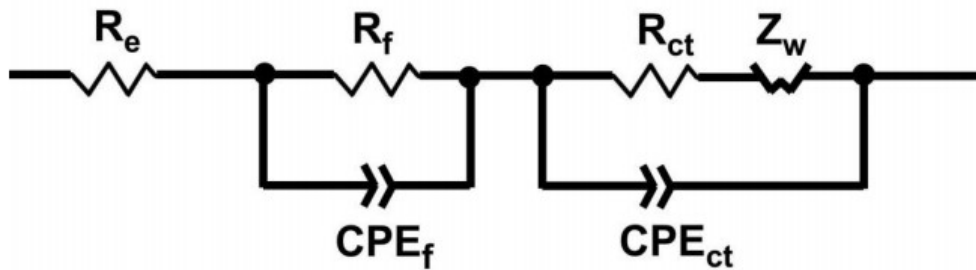

**Figure S5** Equivalent circuit model for Nyquist plots in Figure 4e.

The equivalent circuit model (Figure S5) includes ohmic resistance of the electrolyte and cell components ( $R_e$ ), SEI layer resistance ( $R_f$ ), charge-transfer resistance ( $R_{ct}$ ), Warburg diffusion impedance ( $Z_w$ ), dielectric relaxation capacitance ( $CPE_f$ ) and double layer capacitance ( $CPE_{ct}$ ).

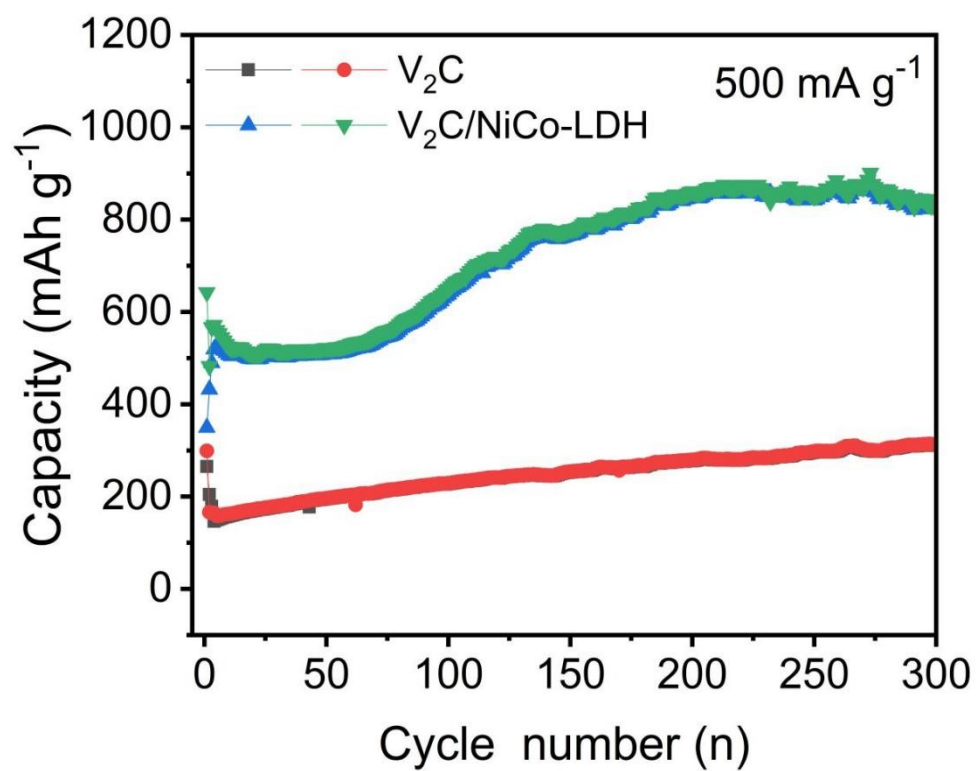

**Figure S6** Cycling behaviors of  $V_2C$  and  $V_2C/NiCo-LDH$  electrodes at  $500 \text{ mA g}^{-1}$ .

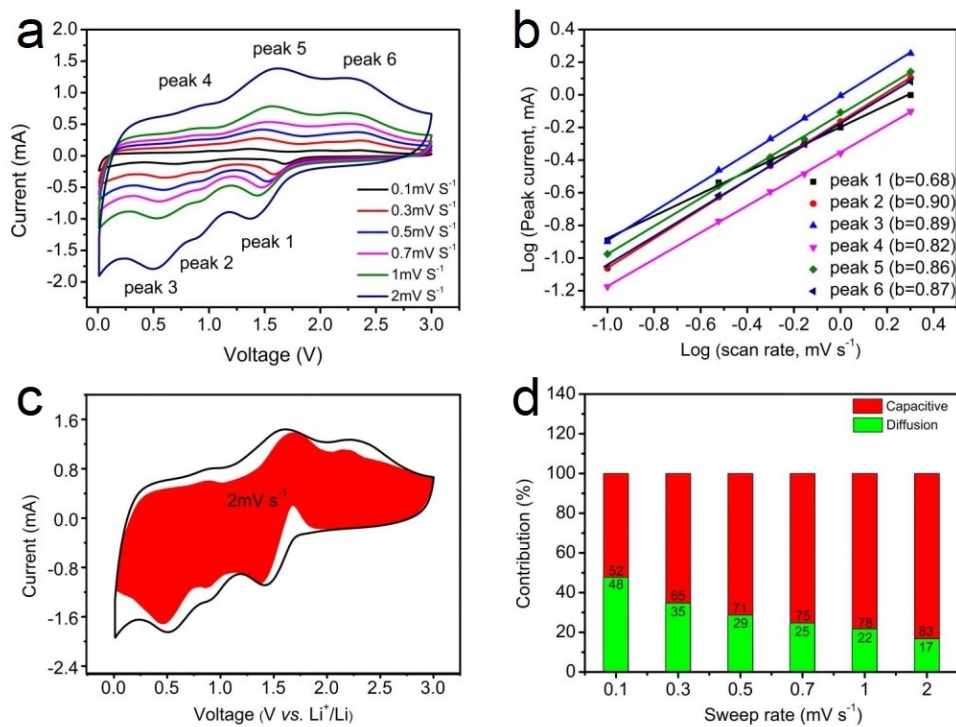

**Figure S7** (a) CV curves of the V<sub>2</sub>C/NiCo-LDH electrode at different scan rates as indicated; (b) Relationship between peak current and scan rate at different scan rates; (c) CV profile at 2 mV s<sup>-1</sup> with the capacitive contribution (red region); (d) Normalized contribution ratios of the capacitive (red) and diffusion-dominated (green) capacities at various sweep rates based on quantitative analysis.
